# Supplementary material for: SIRT7 deficiency suppresses inflammation, induces EndoMT, and increases vascular permeability in primary pulmonary endothelial cells
Source: Sci Rep. 2020 Jul 27;10:12497. doi: 10.1038/s41598-020-69236-z (PMC7385158; doi:10.1038/s41598-020-69236-z)

# SIRT7 Deficiency Suppresses Inflammation, Induces EndoMT, and Increases Vascular Permeability in Primary Pulmonary Endothelial Cells

Anne E. Wyman<sup>1,2,3,4\*</sup>, Trang T.T. Nguyen<sup>2</sup>, Pratap Karki<sup>2</sup>, Mohan E. Tulapurkar<sup>2</sup>, Chen-Ou Zhang<sup>2</sup>, Junghyun Kim<sup>2</sup>, Theresa G. Feng<sup>5</sup>, Abdoulaye J. Dabo<sup>4</sup>, Nevins W. Todd<sup>2,3</sup>, Irina G. Luzina<sup>2,3</sup>, Patrick Geraghty<sup>4</sup>, Robert F. Foronjy<sup>4</sup>, Jeffrey D. Hasday<sup>2,3</sup>, Anna A. Birukova<sup>2</sup>, Sergei P. Atamas<sup>2,3</sup>, and Konstantin G. Birukov<sup>2</sup>

<sup>1</sup>Geriatric Research Education and Clinical Center (GRECC), VA Maryland Health Care Center, Baltimore VA Medical Center, <sup>2</sup>Department of Medicine, University of Maryland School of Medicine, <sup>3</sup>Research Service, Baltimore VA Medical Center, <sup>4</sup>Departments of Medicine and Cell Biology, SUNY Downstate Health Sciences University, <sup>5</sup>Department of Anesthesiology, SUNY Downstate Health Sciences University

\*Address for correspondence: Anne E. Wyman, MD. SUNY Downstate Health Sciences University, 450 Clarkson Ave, MSC:19, Brooklyn, NY 11203.

[Anne.Wyman@downstate.edu](mailto:Anne.Wyman@downstate.edu).

### Supplementary Figure 1

Full-length WBs for SIRT7 (**A**), ICAM1 (**B**),  $\alpha$ -tubulin (**C**), VCAM1 (**D**), and  $\alpha$ -tubulin (**E**) for panel C in Figure 3.  $\alpha$ -tubulin in panel **C** is from the same WB membrane as ICAM1;  $\alpha$ -tubulin in panel **E** is from the same membrane as VCAM1.

### Supplementary Figure 2

Full-length WBs for SIRT7 (**A**), VCAM1 (**B**), NF $\kappa$ B (**C**) and  $\alpha$ -tubulin (**D**) for panel D in Figure 3.

### Supplementary Figure 3

Effects of LPS on SIRT7 and SIRT7 silencing on inflammatory mediators in airway epithelial cells. **A**: SIRT7 mRNA normalized to  $\beta$ -actin levels in airway epithelial cells stimulated with PBS ( $\square$ , n=5) or 1  $\mu$ g/ml LPS ( $\blacksquare$ , n=3) for 24 hours. **B**: SIRT7, IL6, and IL8 mRNA levels normalized to  $\beta$ -actin in airway epithelial cells transfected with CTRL ( $\square$ , n=3) or SIRT7 ( $\blacksquare$ , n=3) siRNA. Data are expressed as fold changes relative to average mRNA levels in unstimulated (LPS 0) cell cultures (**A**) or CTRL-silenced cell cultures (**B**). Bars represent averages and brackets standard deviations. P-values were calculated using the Student's *t*-test.

### Supplementary Figure 4

Full-length WBs for SIRT7 (**A**), NF $\kappa$ B (**B**),  $\alpha$ -tubulin (**C**), and HDAC2 (**D**) for panel A in Figure 4.

### Supplementary Figure 5

Full-length WBs for SIRT7 (**A**), phosphorylated NF $\kappa$ B (**B**), and  $\alpha$ -tubulin (**C**) for panel B in Figure 4.

### Supplementary Figure 6

Phase contrast images of CTRL- and SIRT7-silenced HPAEC cultures viewed under the light microscope at 10x objective 48 hours after transfection.

### Supplementary Figure 7

Time course of LPS effects on pro-inflammatory and pro-fibrotic gene expression in CTRL- and SIRT7-silenced HPAEC. mRNA levels of each indicated RT-qPCR target

at each time point in CTRL-silenced (□) or SIRT7-silenced (■) HPAEC cultures were normalized to GAPDH and expressed as fold changes relative to average mRNA levels in unstimulated (LPS 0), CTRL-silenced cell cultures. Bars represent averages and brackets standard deviations of measurements for two samples per condition. P-values were calculated using the Student's *t*-test. Significant differences ( $P < 0.05$ ) between and CTRL- and SIRT7-silenced cultures for each LPS concentration are denoted by stars.

#### Supplementary Figure 8

Full-length WBs for SIRT7 (**A**), VE-Cadherin (**B**), GAPDH (**C**), PECAM1 (**D**),  $\alpha$ -tubulin (**E**),  $\alpha$ -SMA (**F**), SNAIL (**G**), and GAPDH (**H**) for panel A in Figure 6. Samples for SIRT7 (**A**), VE-Cadherin (**B**), and GAPDH (**C**) were run on a 15-well gel. These images were scaled up proportionally to match widths of protein bands in panels **D-H**, which represent the same samples run on a 10-well gel.

#### Supplementary Figure 9

Full-length WBs for SIRT7 (**A**), PECAM1 (**B**), and  $\alpha$ -tubulin (**C**) for panel C in Figure 6.

#### Supplementary Figure 10

HPAEC plated on microelectrodes were transfected with CTRL or SIRT7 siRNA and transendothelial electric resistance (TER) measurements performed after stimulation with LPS (100 ng/ml) (**A**) or thrombin (0.2 U/ml) (**B**). Resistance data were normalized to the initial voltage and plotted as a normalized resistance. Data points represent averages and brackets standard deviations of three samples per condition in (**A**) and two samples per condition in (**B**). Experiments were performed on at least two separate occasions with similar results.

#### Supplementary Figure 11

Full-length WBs for SIRT7 (**A**), total  $\beta$ -Catenin (**B**),  $\alpha$ -tubulin (**C**), phosphorylated  $\beta$ -Catenin (**D**), and  $\alpha$ -tubulin (**E**) corresponding to panel C in Figure 7.

## Supplementary Figure 12

Effects of SIRT7 silencing on Rho signaling in HPAEC. **A:** Effect of SIRT7 silencing in HPAEC on thrombin-induced protein levels of phosphorylated and total myosin light chain 2 after thrombin stimulation for 15 minutes. Densitometry measurements relative to  $\alpha$ -tubulin (RDU) are shown. Full-length WBs for SIRT7 (**B**), phosphorylated MLC2 (**C**), total MLC2 (**D**), and  $\alpha$ -tubulin (**E**) in panel A.

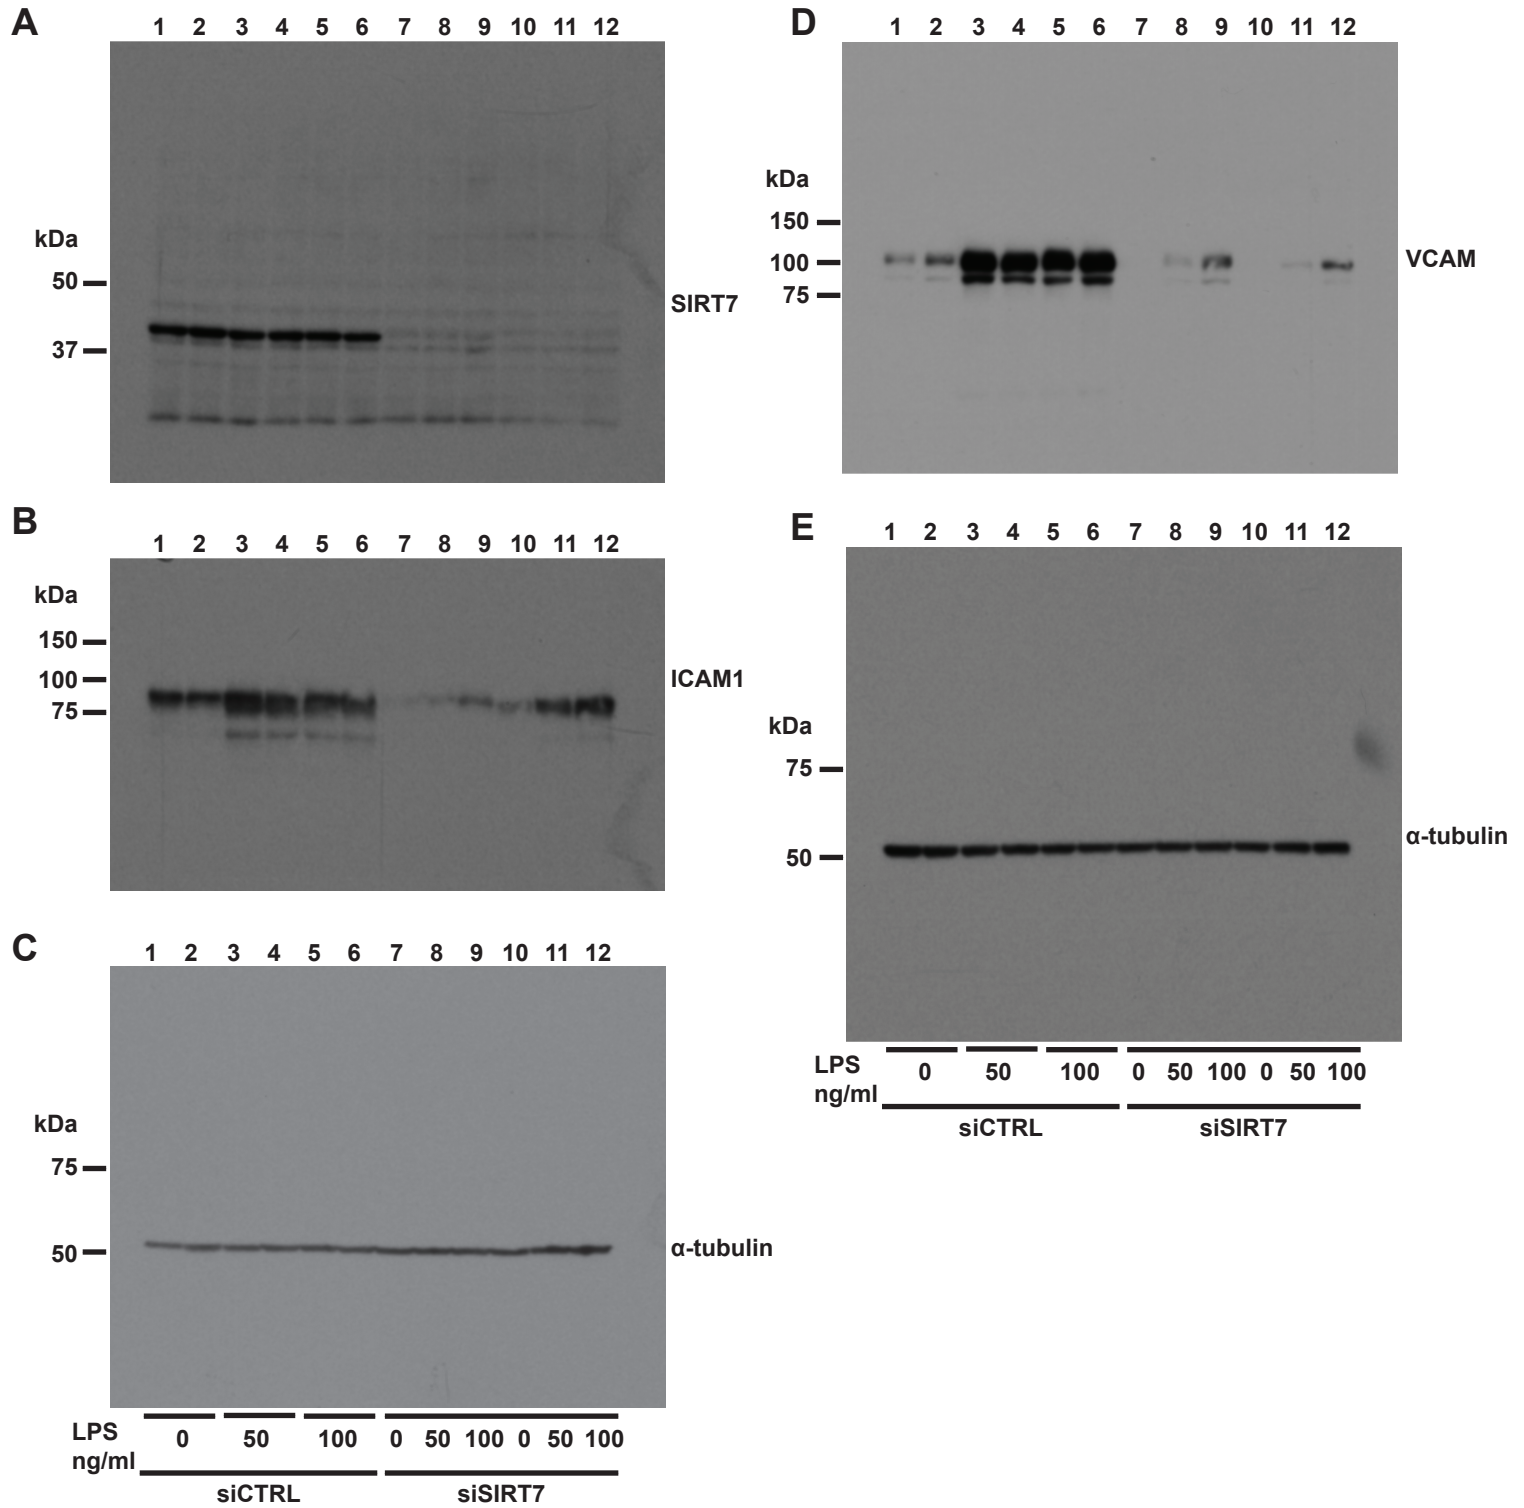

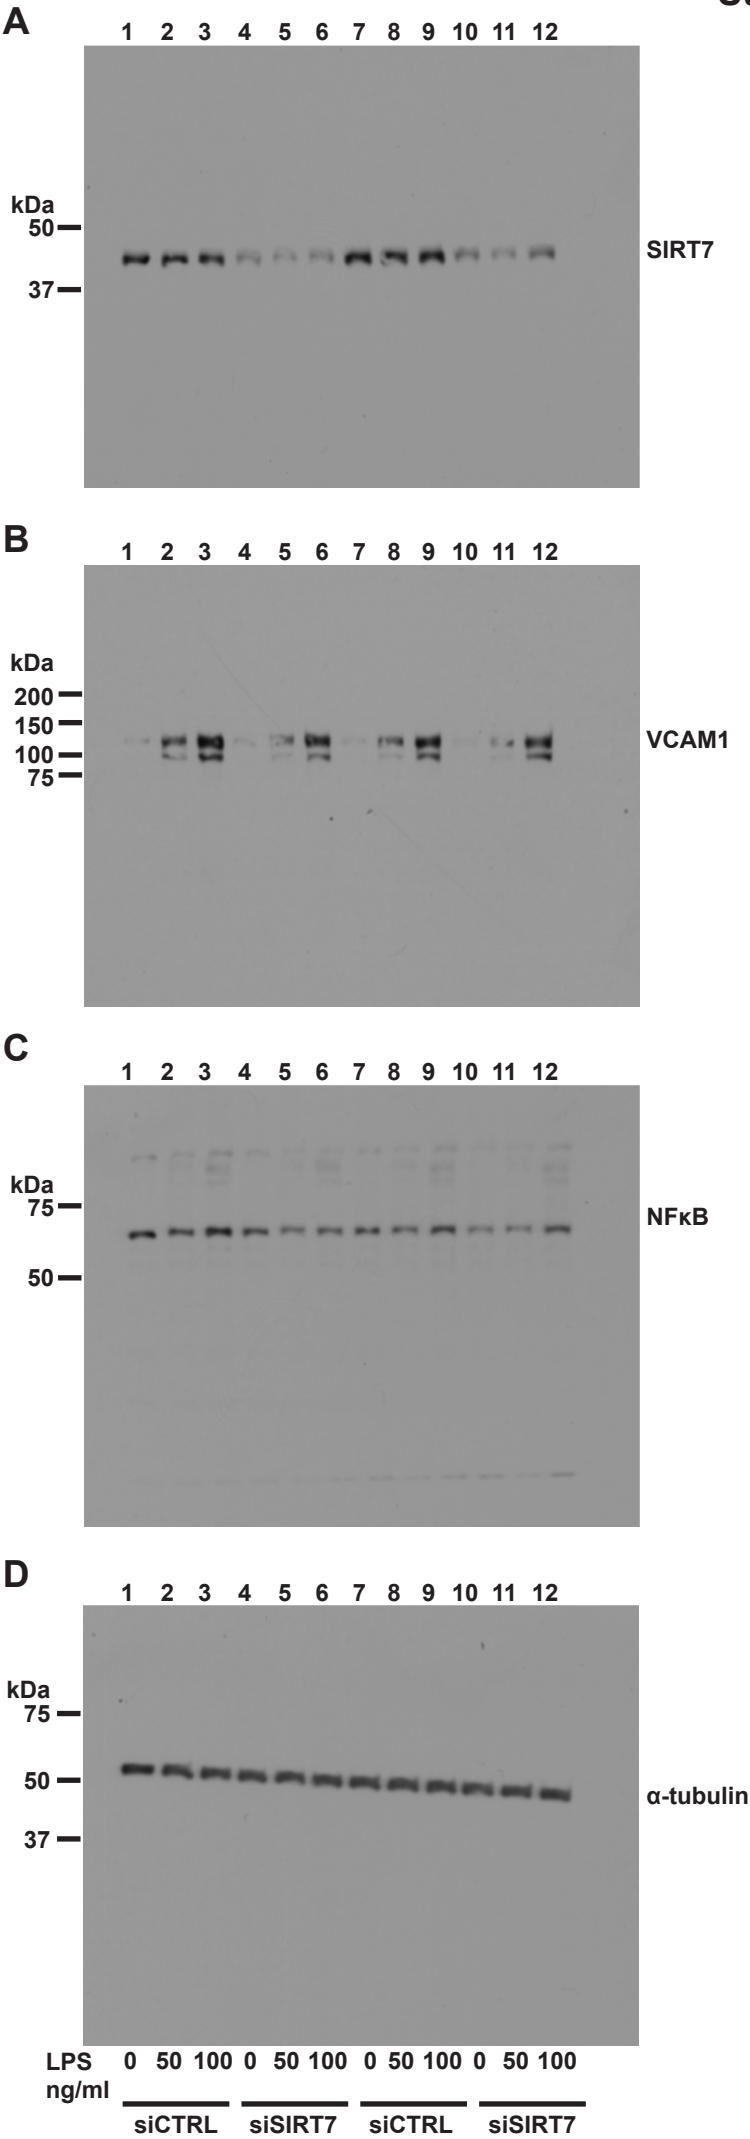

A

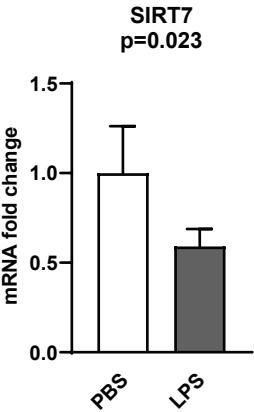

B

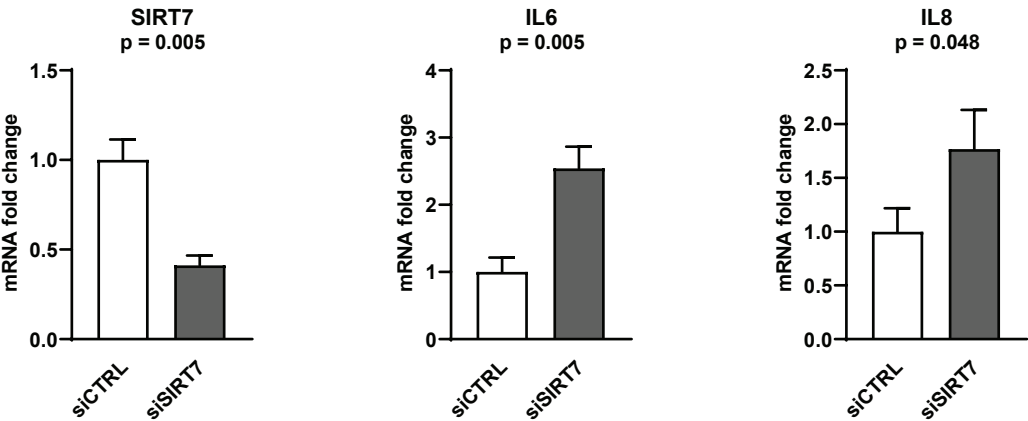

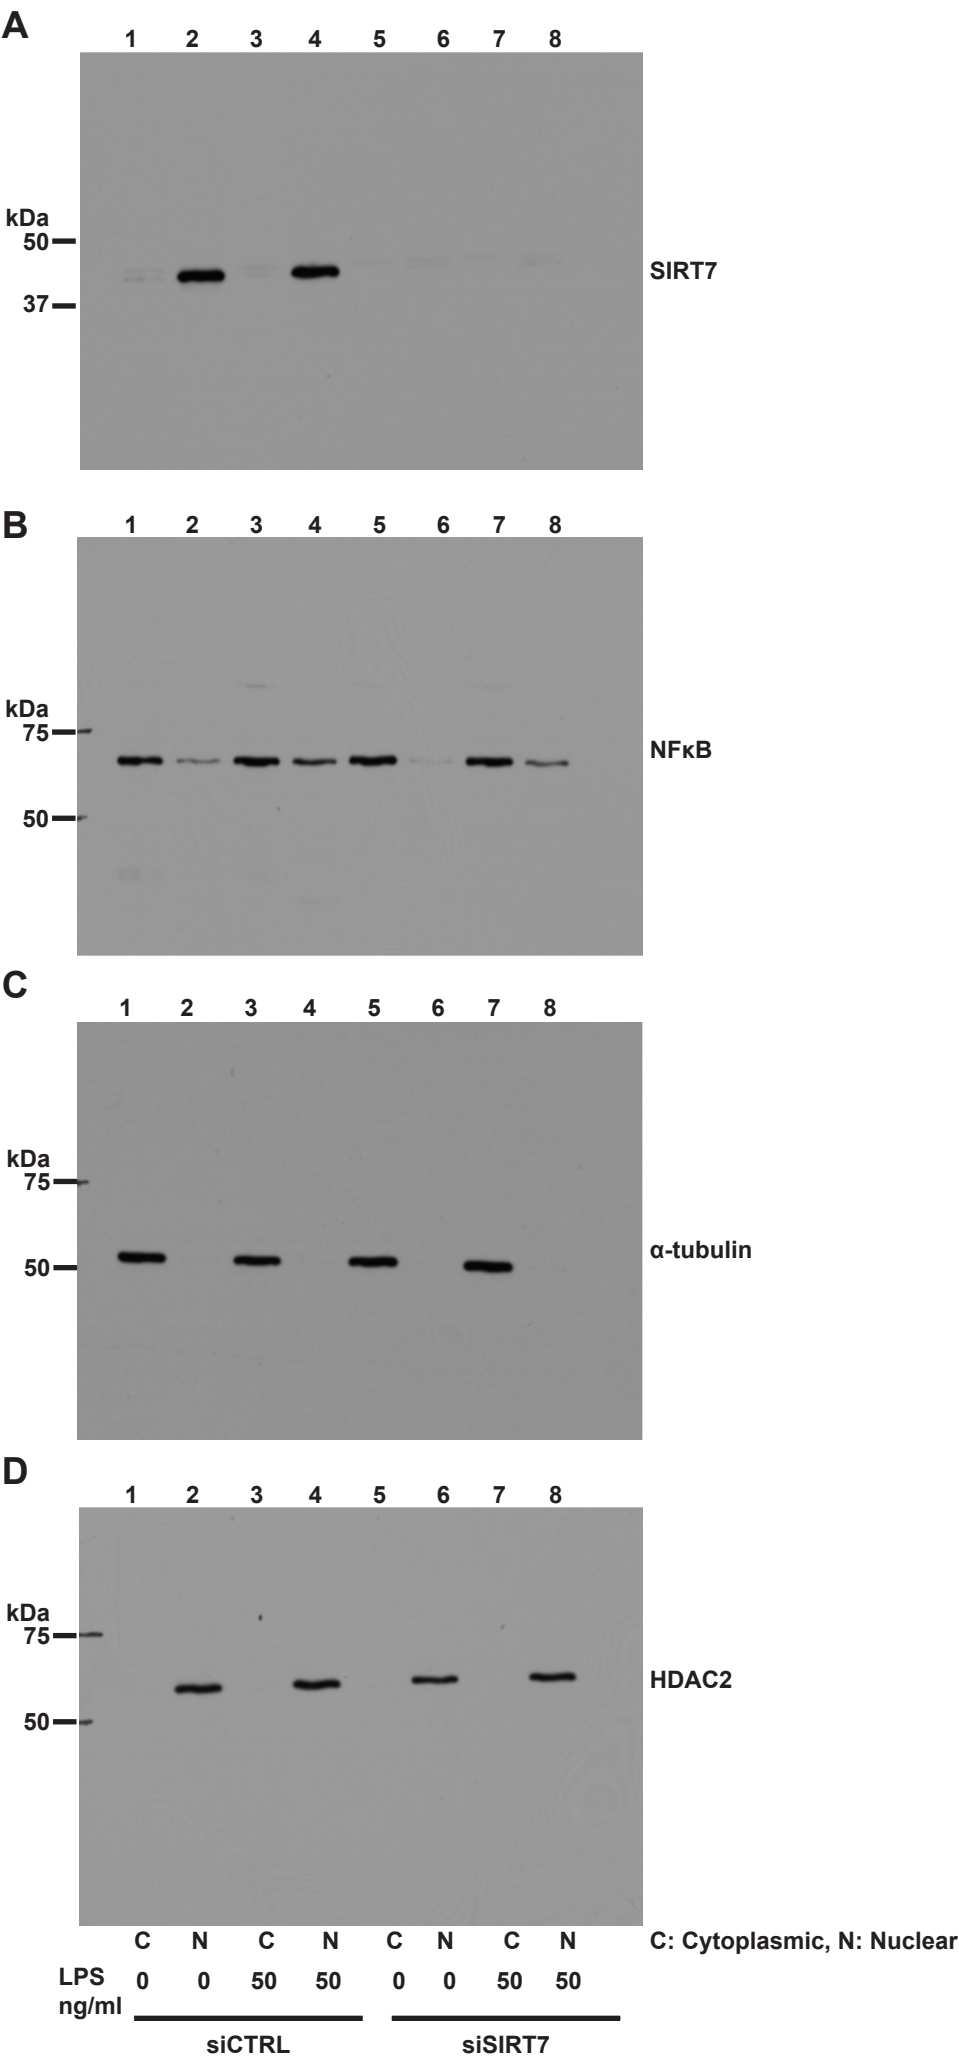

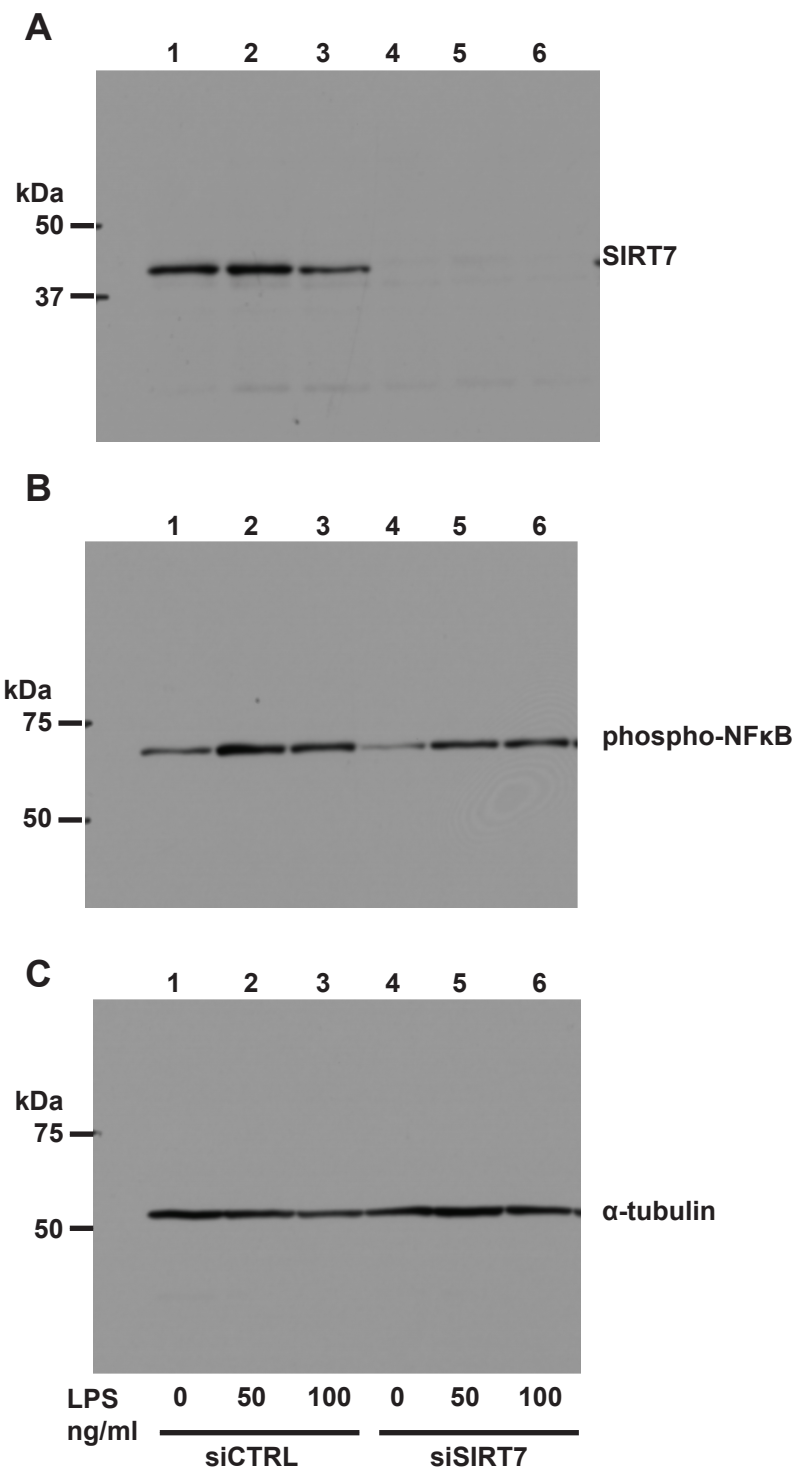

**siCTRL**

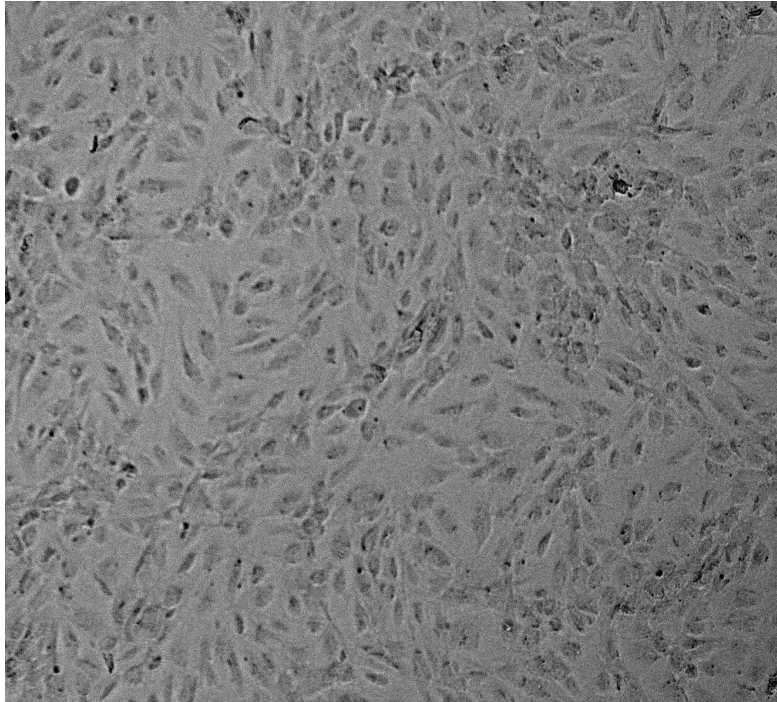

**siSIRT7**

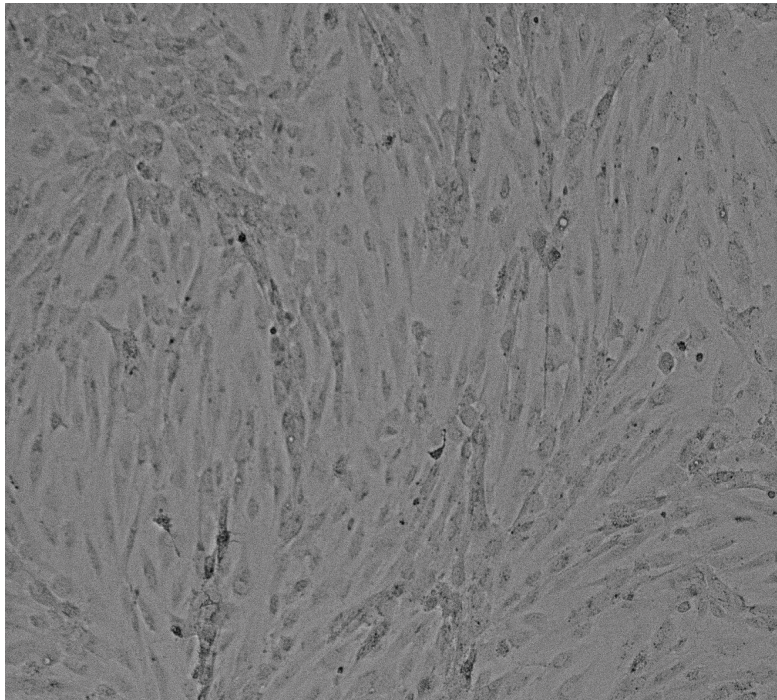

Supplementary Figure 7

□ CTRL siRNA  
■ SIRT7 siRNA

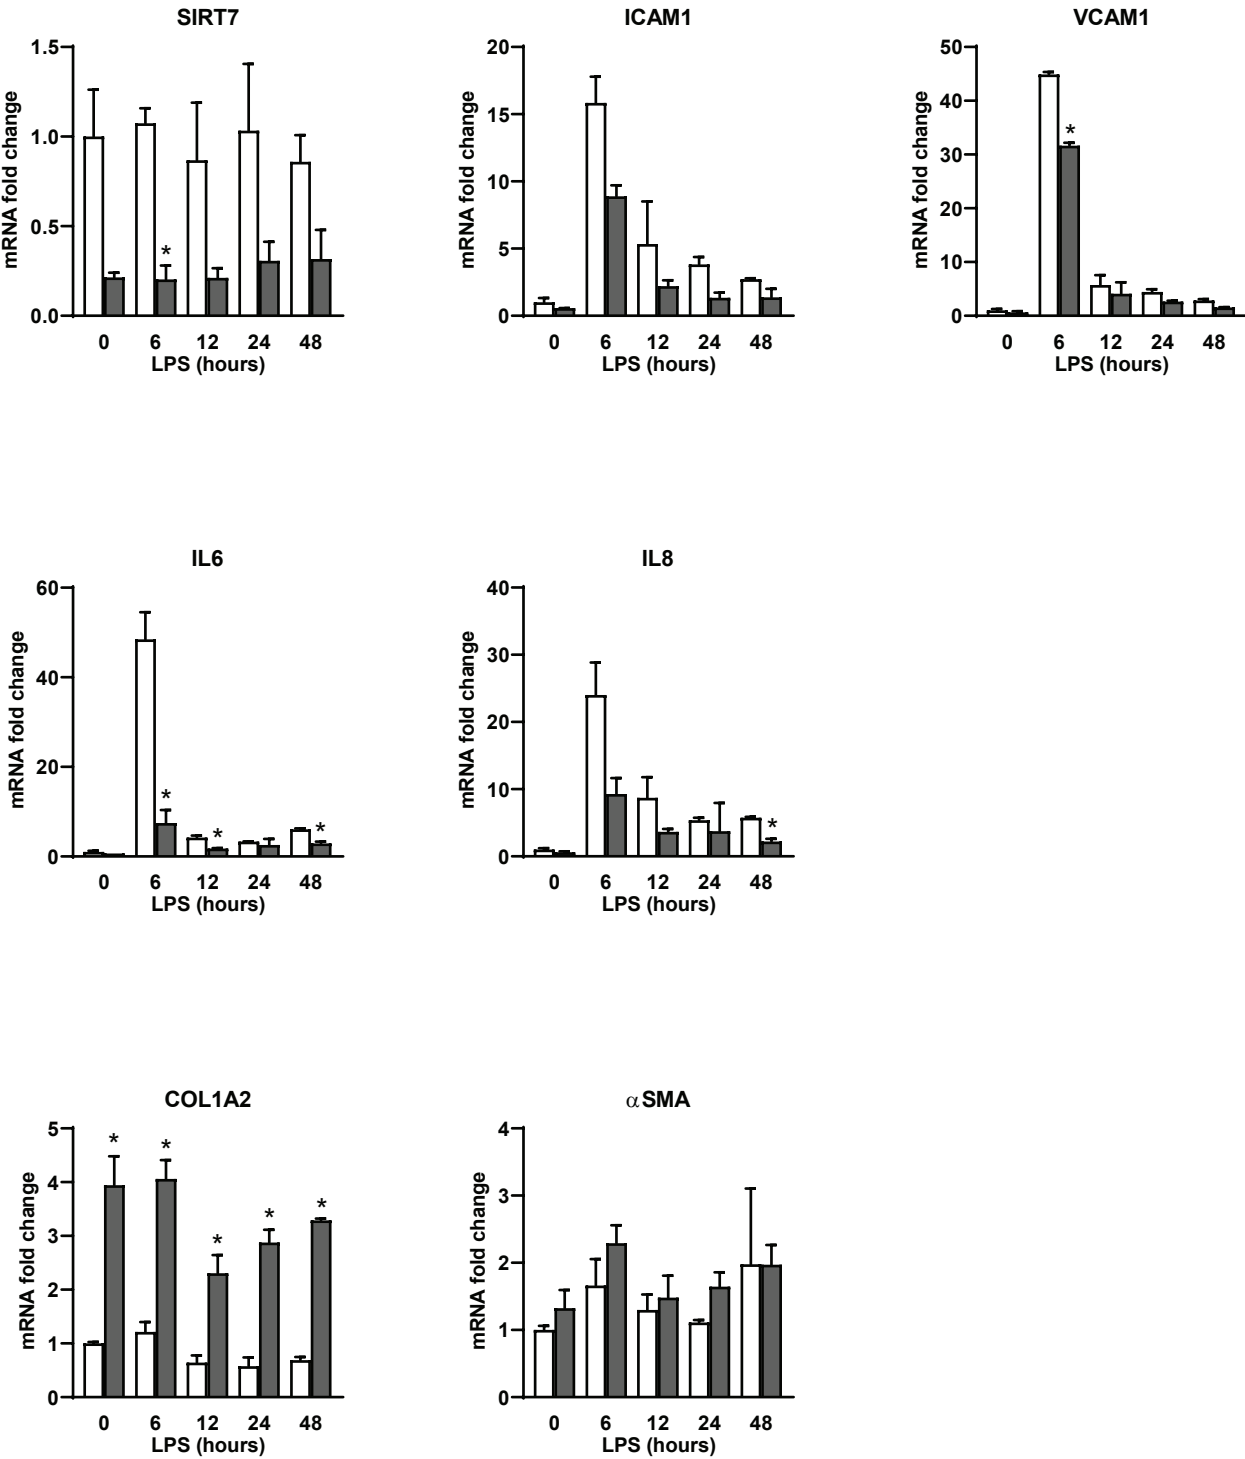

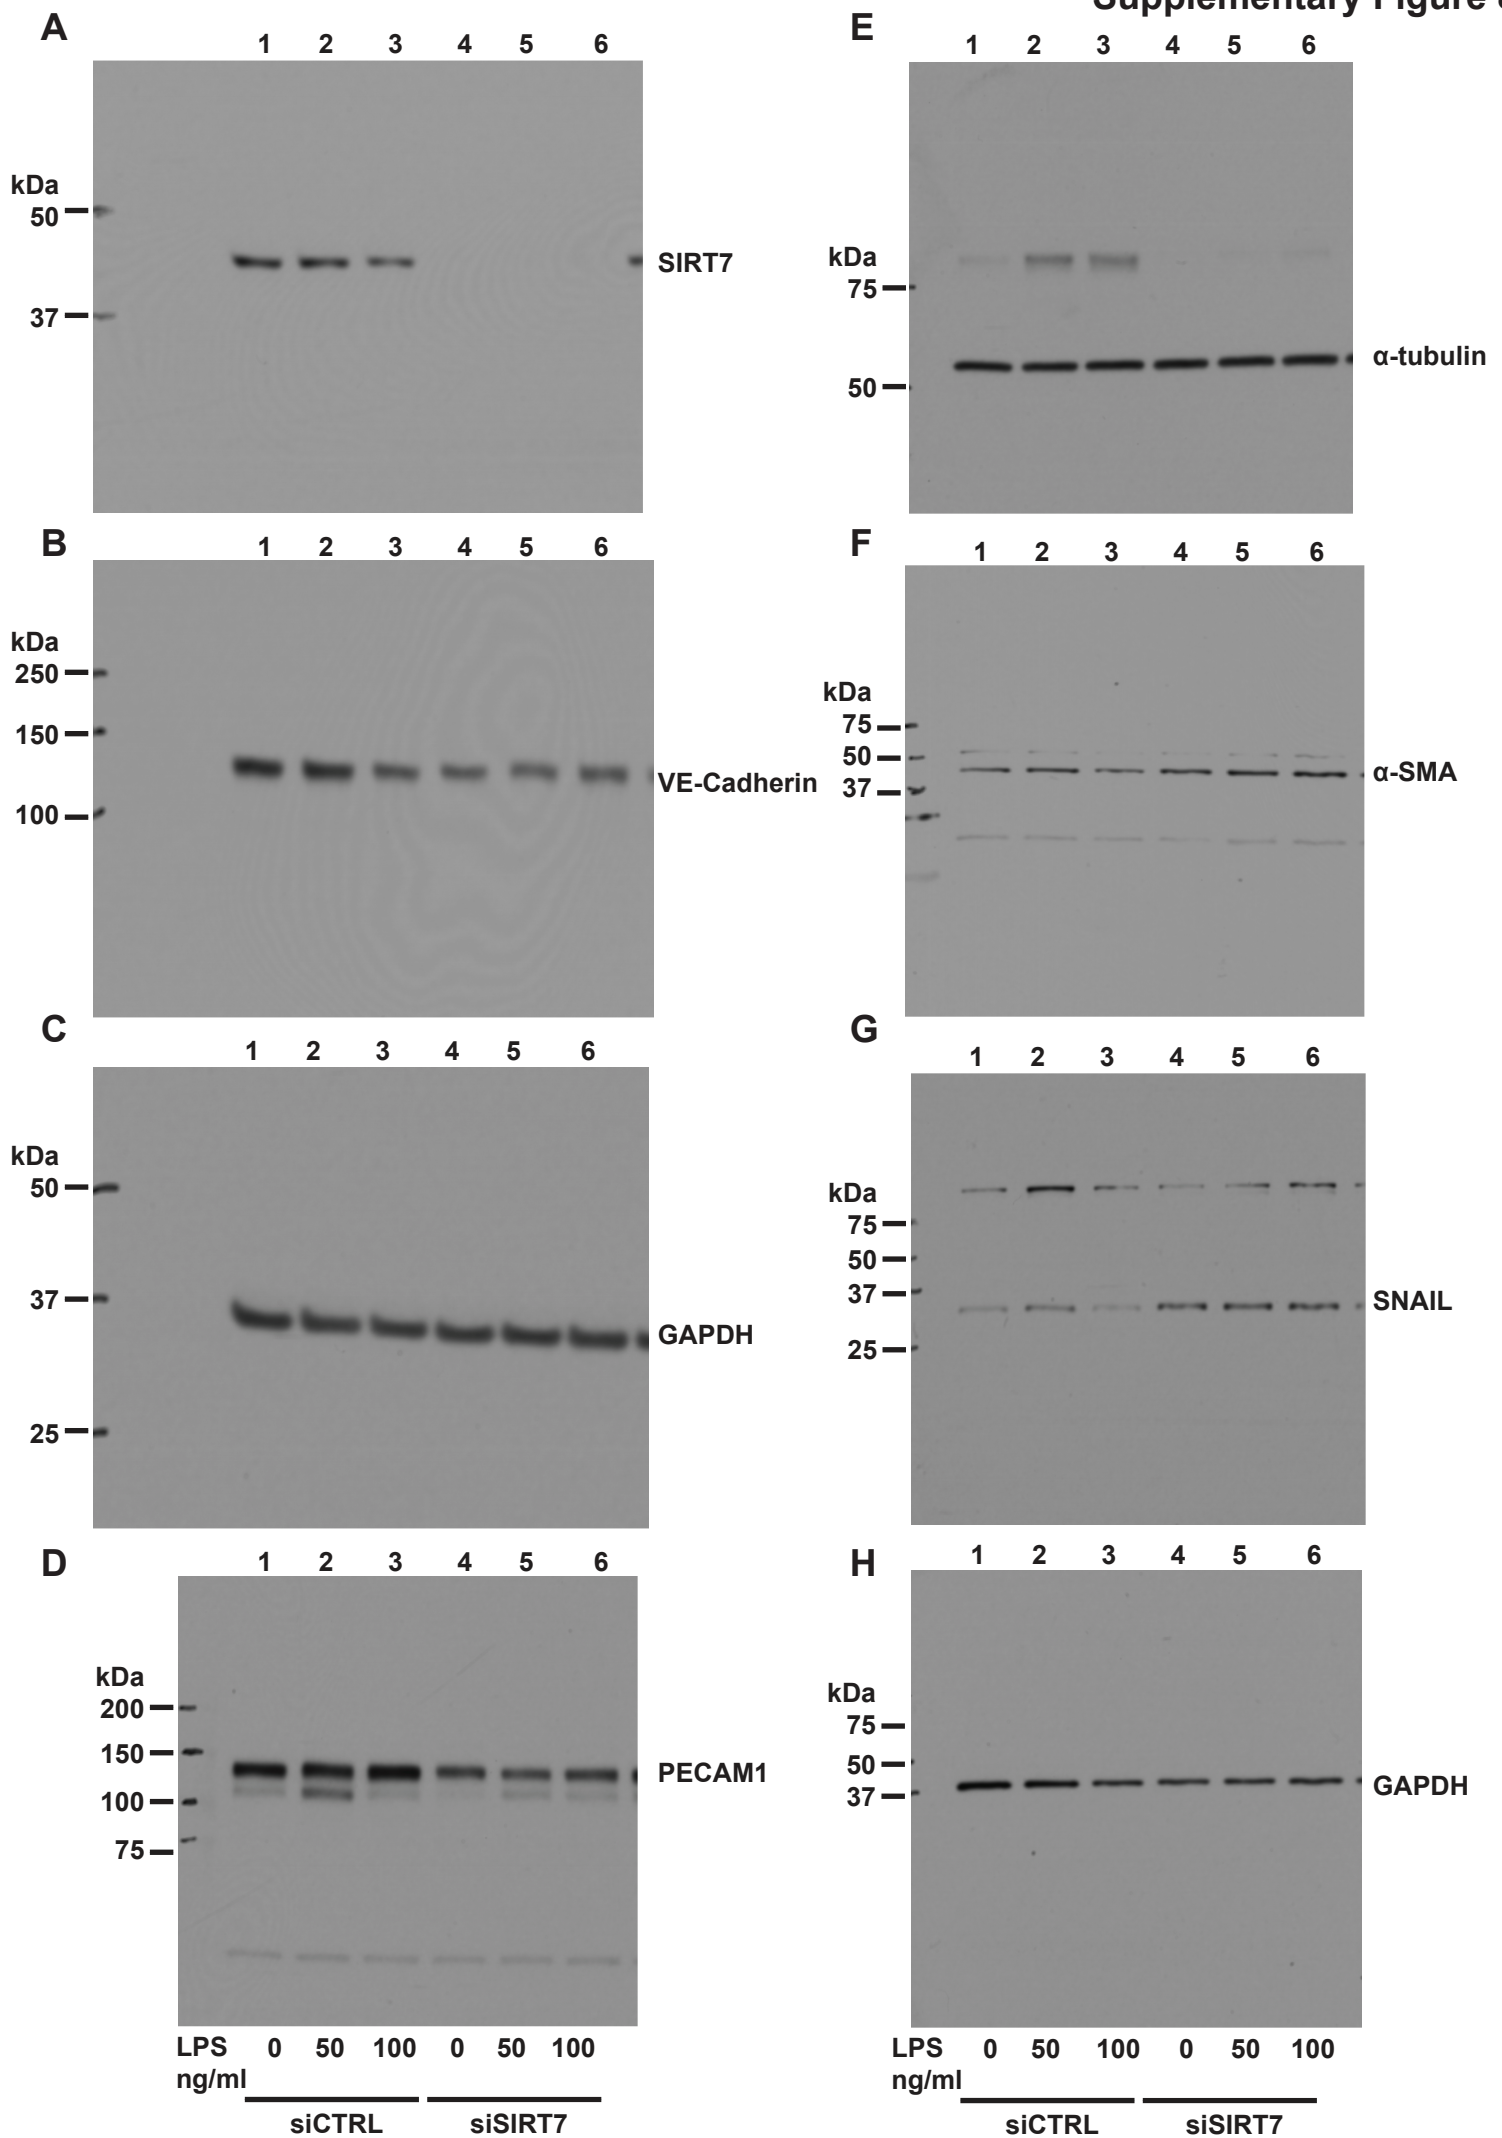

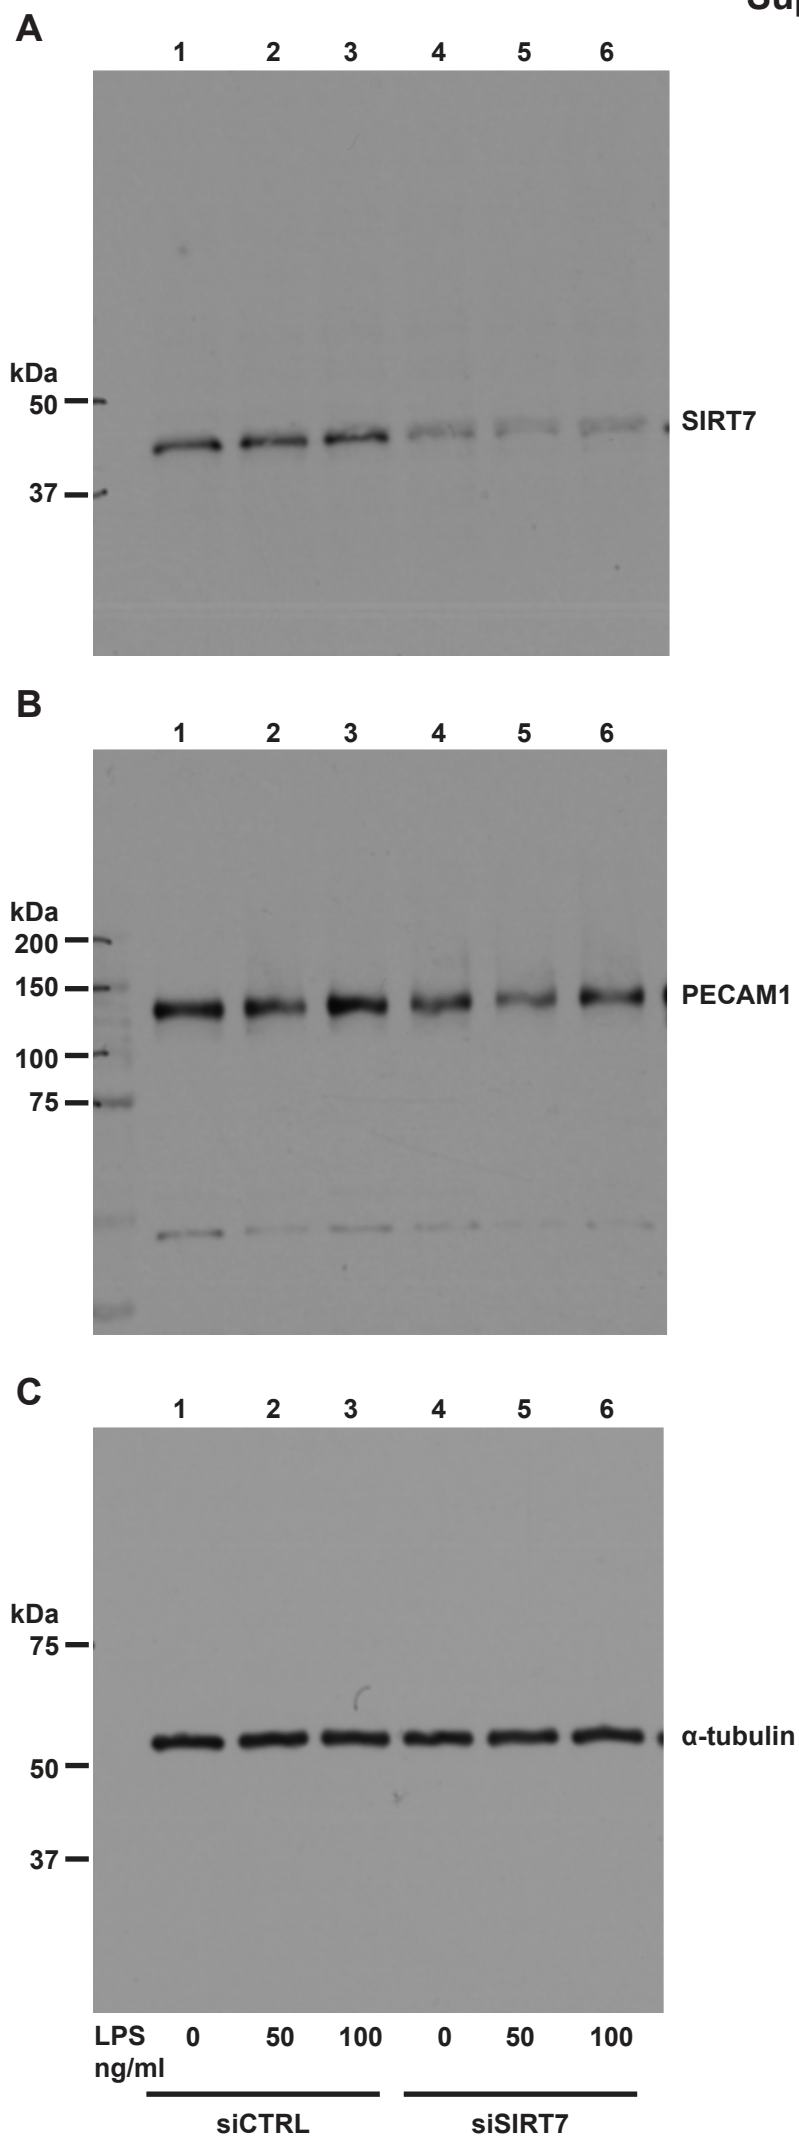

A

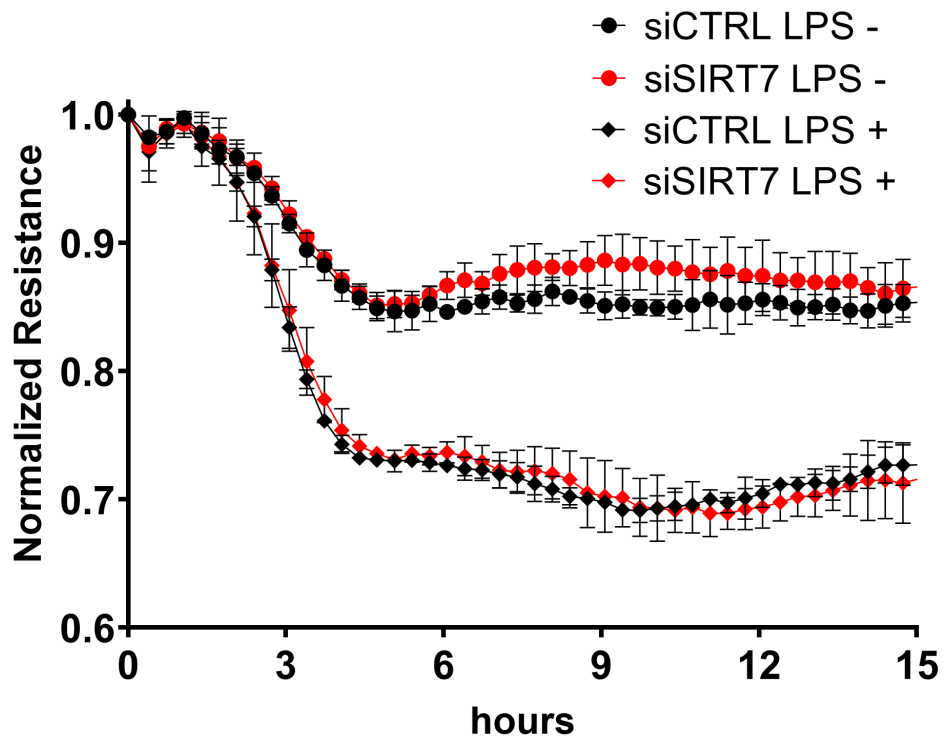

B

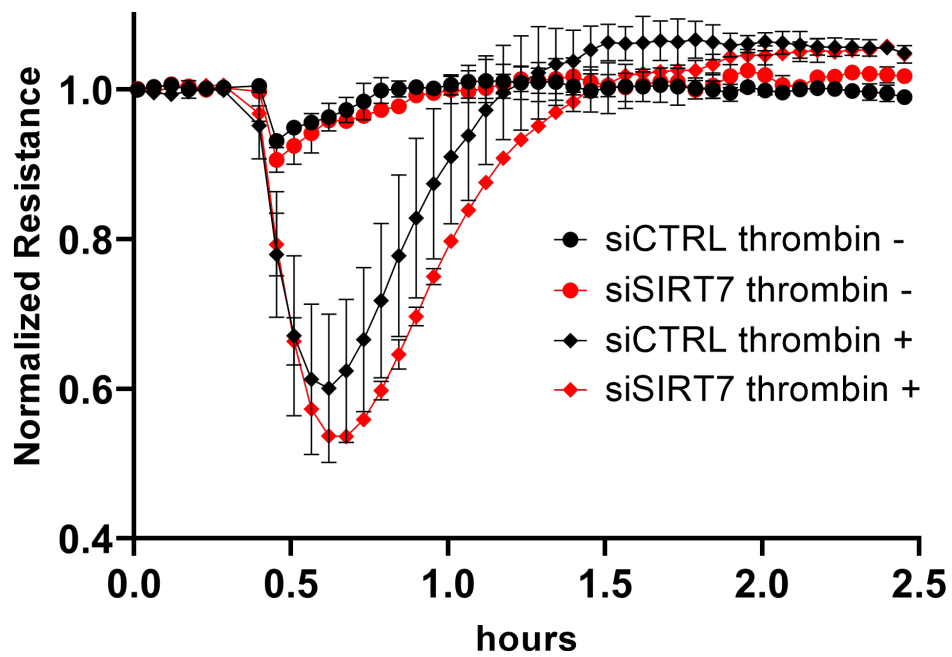

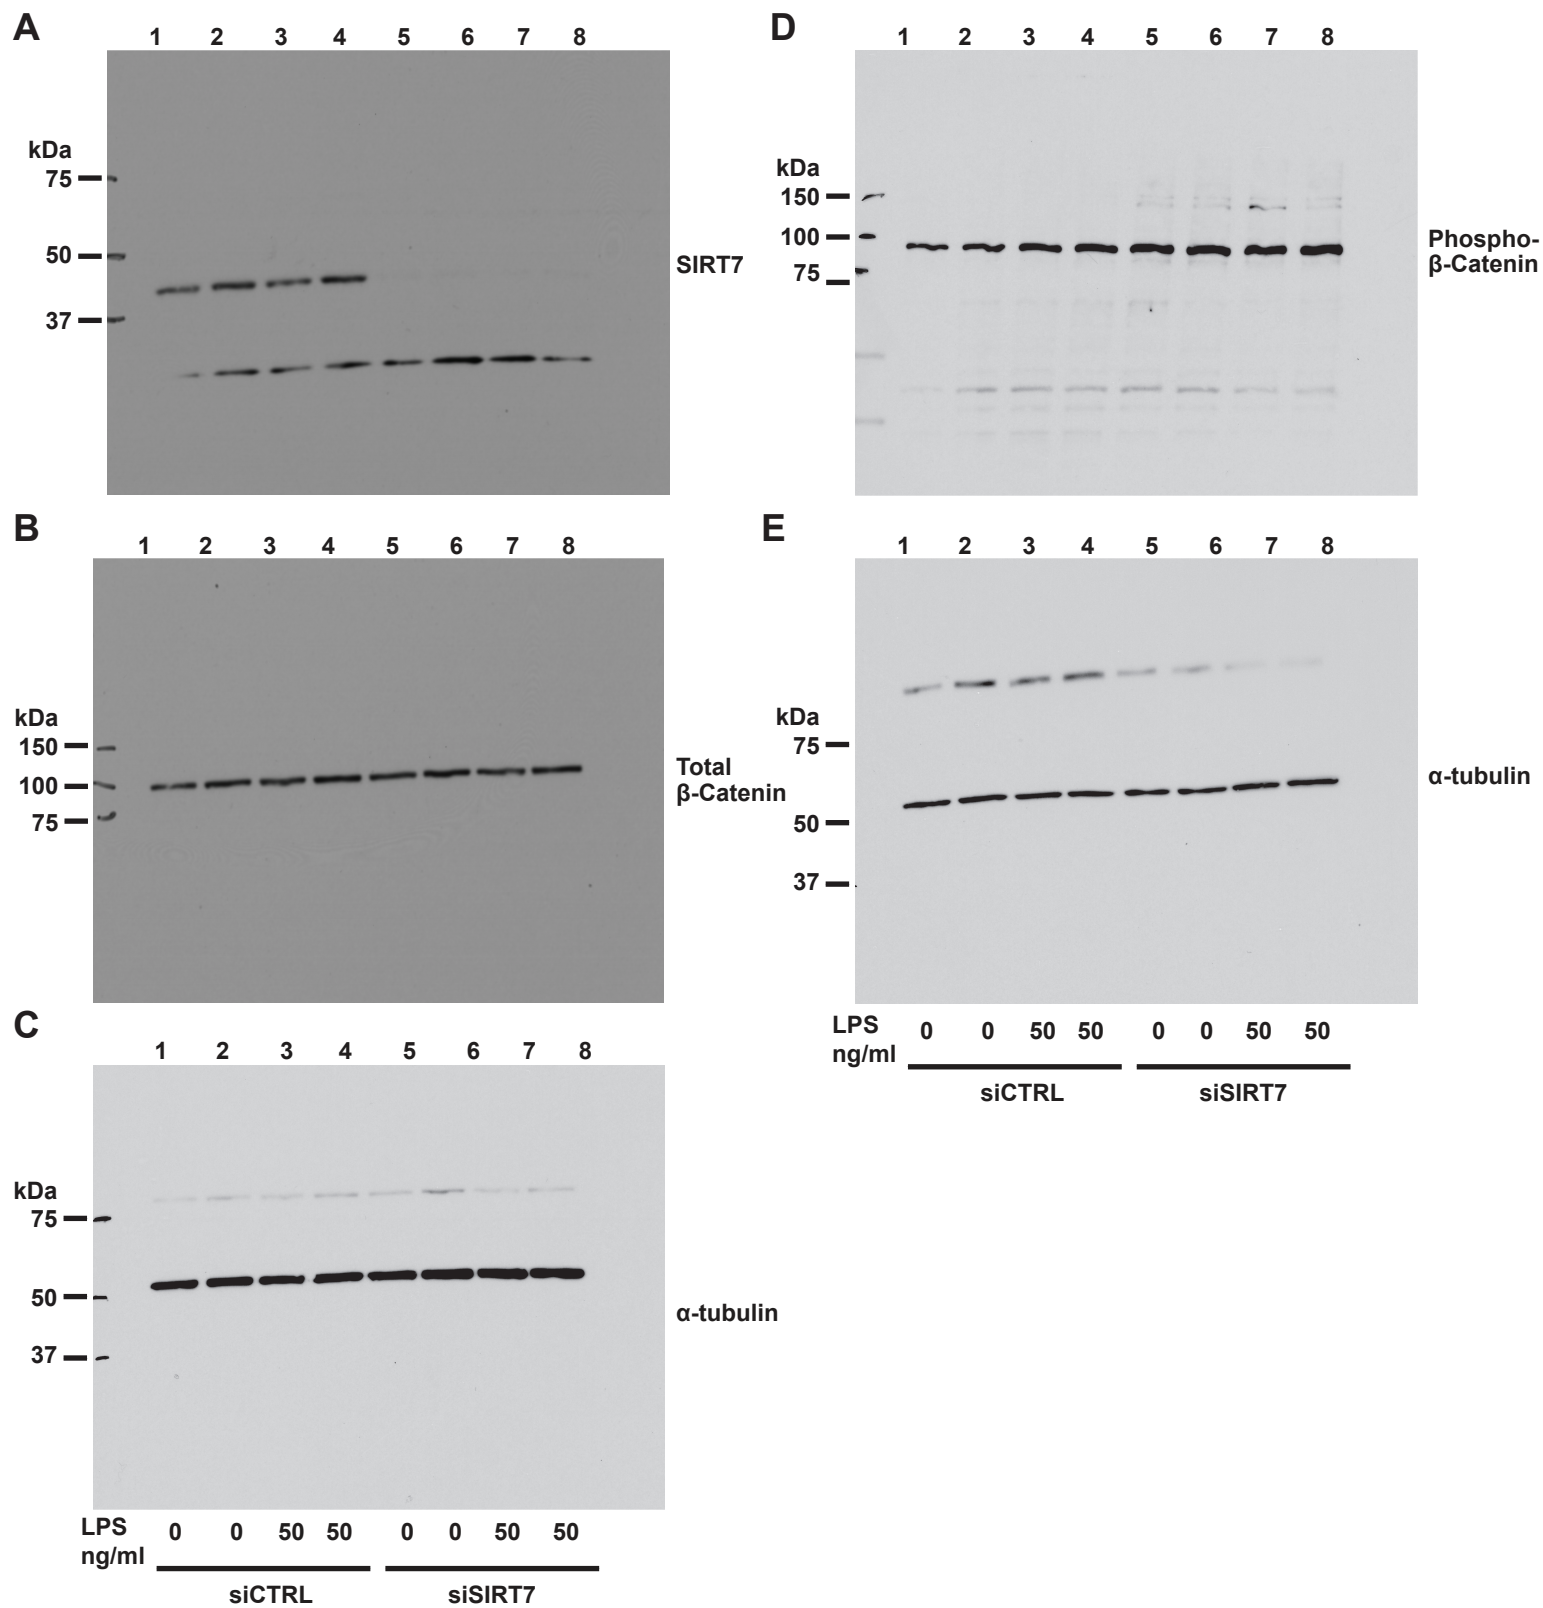

**A**

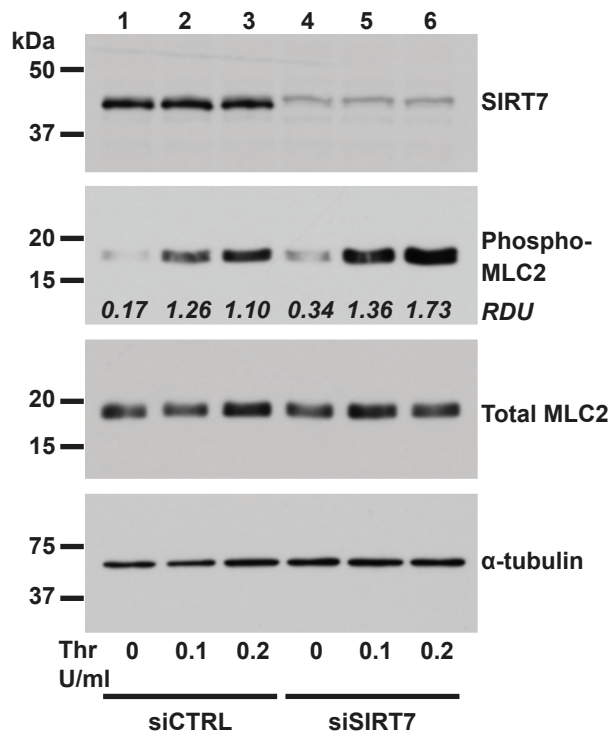

**B**

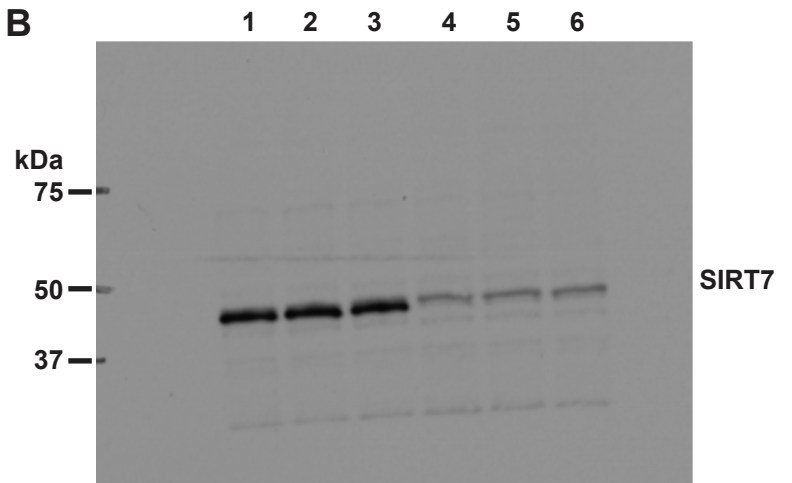

**C**

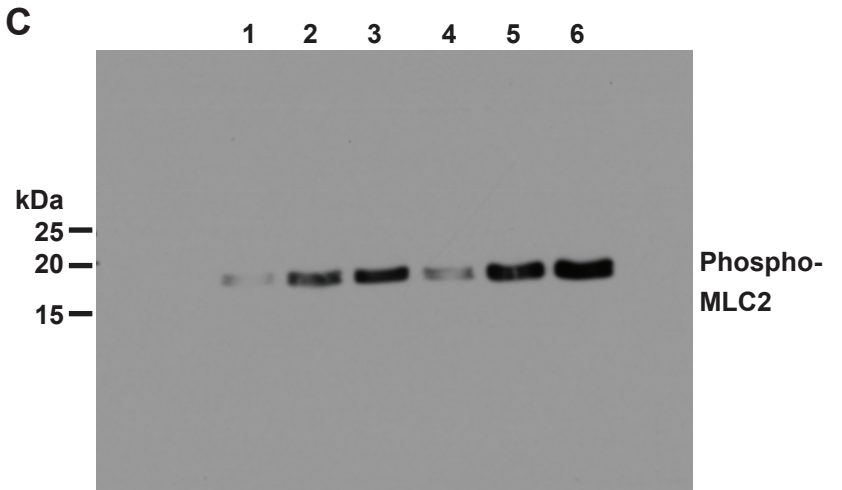

**D**

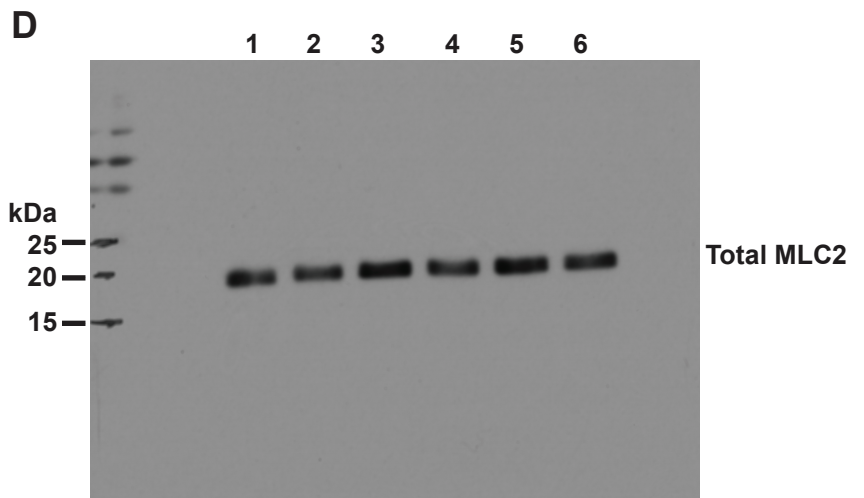

**E**

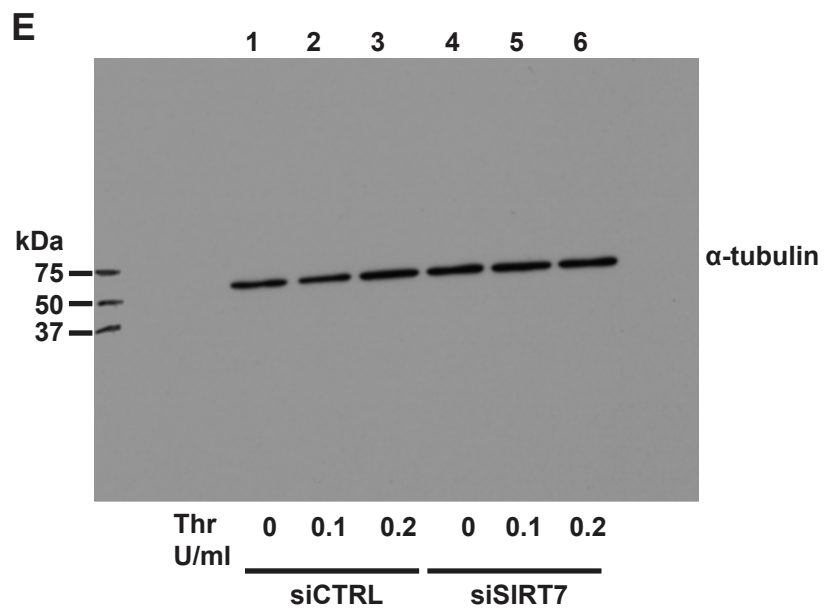

Supplement: Supplementary file 1 — Supplementary Information. [file 41598_2020_69236_MOESM1_ESM.pdf]
